# Supplementary material
Source: PubMed Central journal article supplement (PMC4759395)
Supplement: ajcr0006-0038-f6.pdf [file ajcr0006-0038-f6.pdf]

## Flotillin-1 facilitates lymph node metastasis in cervical cancer

**Table S1.** Probe sequences used for real-time PCR

| Name                | Sequence (5' to 3')   |
|---------------------|-----------------------|
| Flotillin-1-Up      | CTGCTCCTCAATCTGCTGCT  |
| Flotillin-1-Down    | GAAGAAGGCCCGCCTATGAC  |
| GAPDH-Up            | AGAGGCAGGGATGATGTTCTG |
| GAPDH-Down          | AGAGGCAGGGATGATGTTCTG |
| Flotillin-1-shRNA#1 | CCCTCAATGTCAAGAGTGAAA |
| Flotillin-1-shRNA#2 | ACAGAGAGATTACGAACTGAA |
| LEF1-Up             | CACTGTAAGTGATGAGGGGG  |
| LEF1-Down           | TGGATCTCTTTCTCCACCCA  |
| AXIN2-Up            | CTGGTGCAAAGACATAGCCA  |
| AXIN2-Down          | AGTGTGAGGTCCACGGAAAC  |
| VEGFA-Up            | AGCTGCGCTGATAGACATCC  |
| VEGFA-Down          | CTACCTCCACCATGCCAAGT  |
| SNAI1-Up            | AGGTTGGAGCGGTCAGC     |
| SNAI1-Down          | CCTTCTCTAGGCCCTGGCT   |
| FN1-Up              | ACCTCGGTGTTGTAAGGTGG  |
| FN1-Down            | CCATAAAGGGCAACCAAGAG  |
| MYC-Up              | CACCGAGTCGTAGTCGAGGT  |
| MYC -Down           | TTTCGGGTAGTGGAAAACCA  |
| MMP2-Up             | GGAAAGCCAGGATCCATTTT  |
| MMP2-Down           | ATGCCGCCTTAACTGGAG    |
| MMP9-Up             | TTGGTCCACCTGGTTCAACT  |
| MMP9-Down           | ACGACGTCTTCCAGTACCGA  |
| HIF1A-Up            | TGGCTGCATCTCGAGACTTT  |
| HIF1A-Down          | GAAGACATCGCGGGGAC     |
| XIAP-Up             | CCGGCCCAAGTAAAAGGTG   |
| XIAP-Down           | TTTGTAGACTGCGTGGCACT  |
| TNF-Up              | AGATGATCTGACTGCCTGGG  |
| TNF-Down            | CTGCTGCACTTTGGAGTGAT  |
| IL1B-Up             | AAGCCCTTGCTGTAGTGGTG  |
| IL1B-Down           | GAAGCTGATGGCCCTAAACA  |
| CXCL8-Up            | AAATTTGGGGTGGAAAGGTT  |
| CXCL8-Down          | TCCTGATTTCTGCAGCTCTGT |
| BCL2-Up             | GAGAAATCAAACAGAGGCCG  |
| BCL2-Down           | CTGAGTACCTGAACCGGCA   |
| VEGFC-Up            | CGGACTCGACCTCTCGG     |
| VEGFC-Down          | TGGACACAGACCGTAACTGC  |

## Flotillin-1 facilitates lymph node metastasis in cervical cancer

**Table S2.** Spearman correlation analysis between flotillin-1 expression level and clinical/pathological characteristics

| Variables             | Flotillin-1 expression level |         |
|-----------------------|------------------------------|---------|
|                       | Spearman Correlation         | P-value |
| Histological type     | 0.123                        | 0.031   |
| Lymph node metastasis | 0.357                        | < 0.001 |

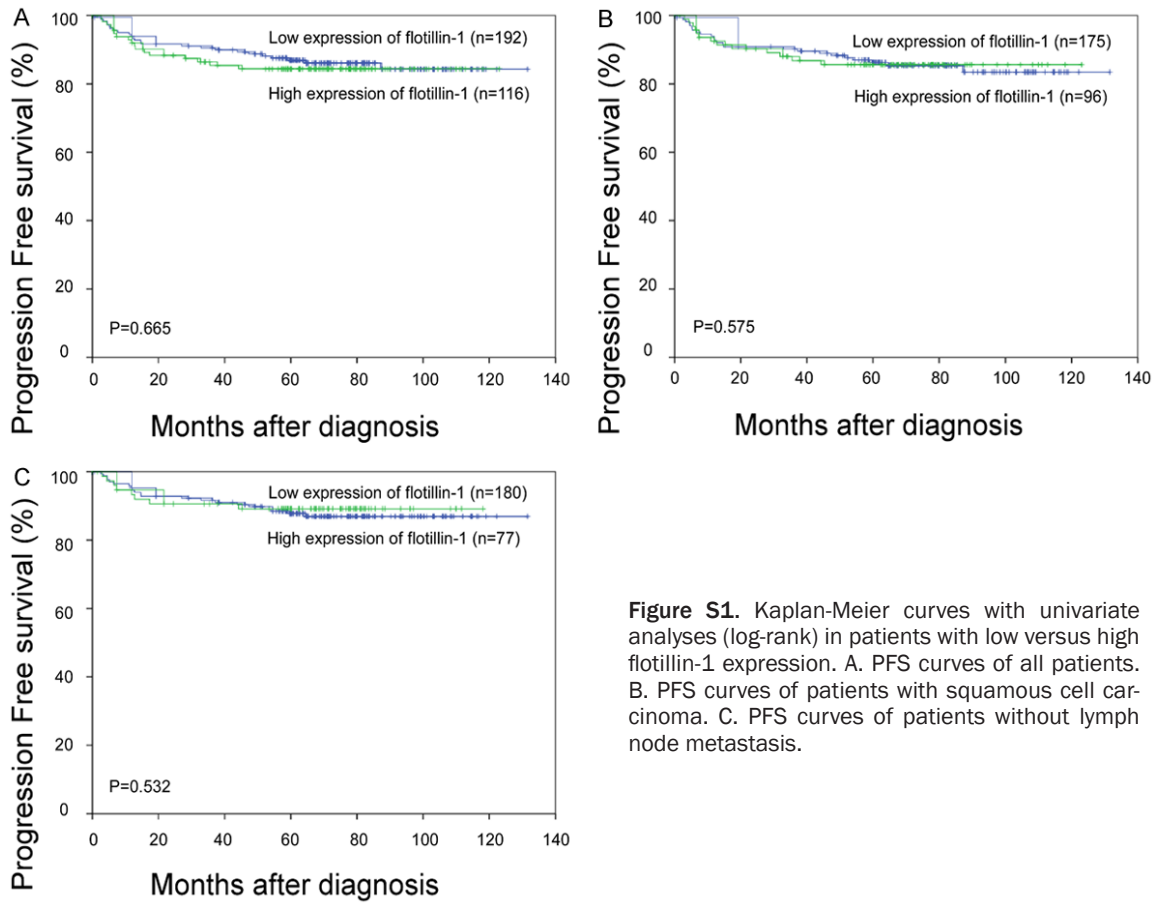

**Figure S1.** Kaplan-Meier curves with univariate analyses (log-rank) in patients with low versus high flotillin-1 expression. A. PFS curves of all patients. B. PFS curves of patients with squamous cell carcinoma. C. PFS curves of patients without lymph node metastasis.
